# Supplementary material for: Identification of Phytoconstituents in Leea indica (Burm. F.) Merr. Leaves by High Performance Liquid Chromatography Micro Time-of-Flight Mass Spectrometry
Source: MDPI journal article supplement (doi:10.3390/molecules24040714), 2019-02-16
Supplement: s1 [file s1]

*Supporting information*

**Identification of Phytoconstituents of *Leea indica* (Burm. F.) Merr. Leaves by High Performance Liquid Chromatography Micro Time-of-Flight Mass Spectrometry**

Deepika Singh\*, Yin-Yin Siew, Teck-Ian Chong, Hui-Chuing Yew, Samuel Shan-Wei Ho, Claire Sophie En-Shen Lim, Wei-Xun Tan, Soek-Ying Neo, Hwee-Ling Koh\*

Department of Pharmacy, Faculty of Science, National University of Singapore, 18 Science Drive 4, Singapore 117543, Singapore

\*Correspondence: phads@nus.edu.sg; phakohhl@nus.edu.sg; Tel.: +65-65163120 (H.-L.K.)

**Table of contents**

|                                                                                                    |    |
|----------------------------------------------------------------------------------------------------|----|
| MS <sup>2</sup> spectrum and proposed fragmentation pattern of compound <b>25</b> (Figure S1)..... | S2 |
| MS <sup>2</sup> spectrum and proposed fragmentation pattern of compound <b>26</b> (Figure S2)..... | S2 |
| MS <sup>2</sup> spectrum and proposed fragmentation pattern of compound <b>29</b> (Figure S3)..... | S3 |
| MS <sup>2</sup> spectrum and proposed fragmentation pattern of compound <b>27</b> (Figure S4)..... | S3 |

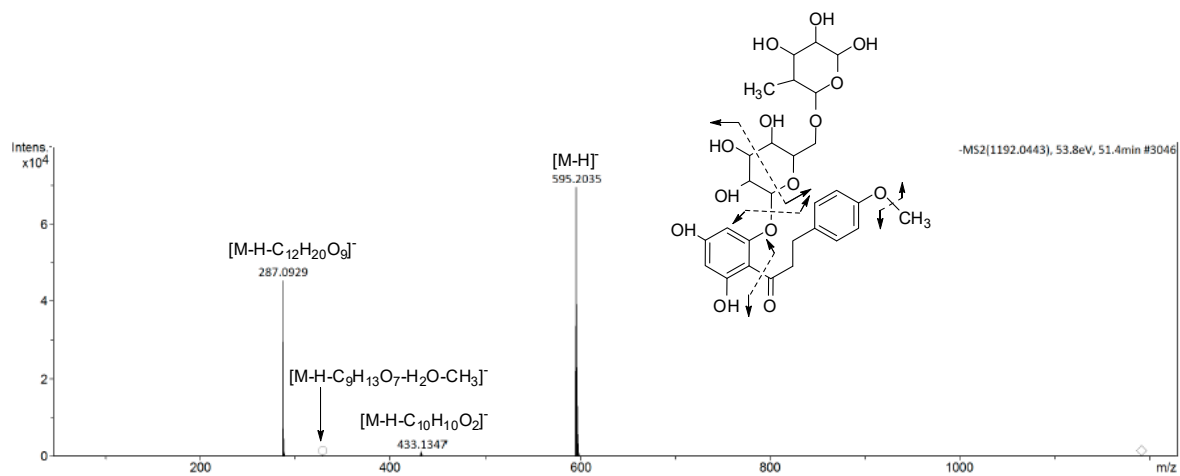

**Figure S1.** MS<sup>2</sup> spectrum and proposed fragmentation pattern of compound 25.

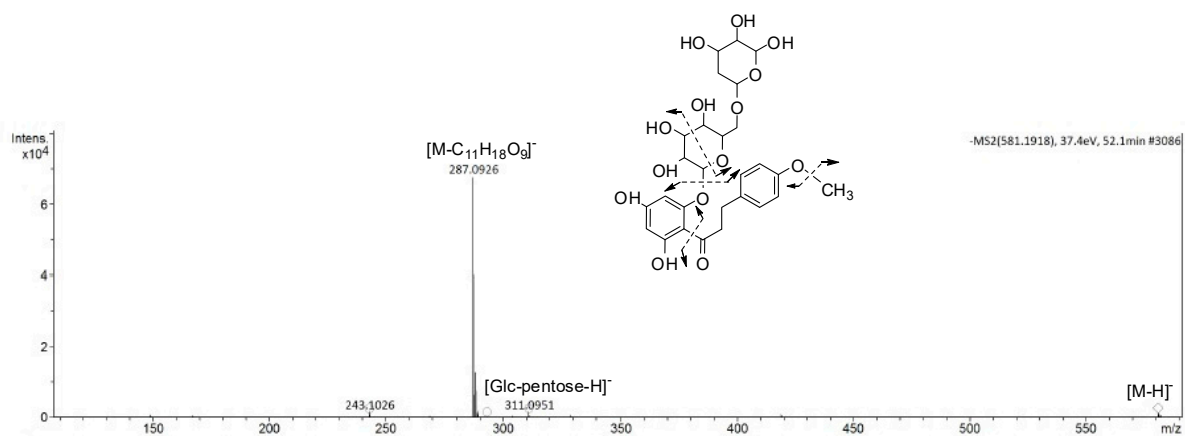

**Figure S2.** MS<sup>2</sup> spectrum and proposed fragmentation pattern of compound 26.

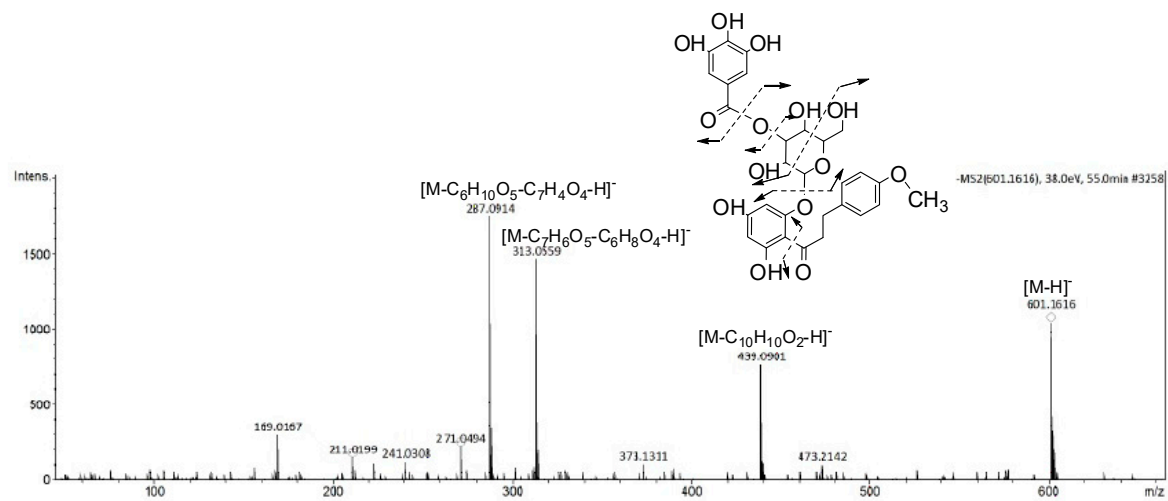

**Figure S3.** MS<sup>2</sup> spectrum and proposed fragmentation pattern of compound **29**.

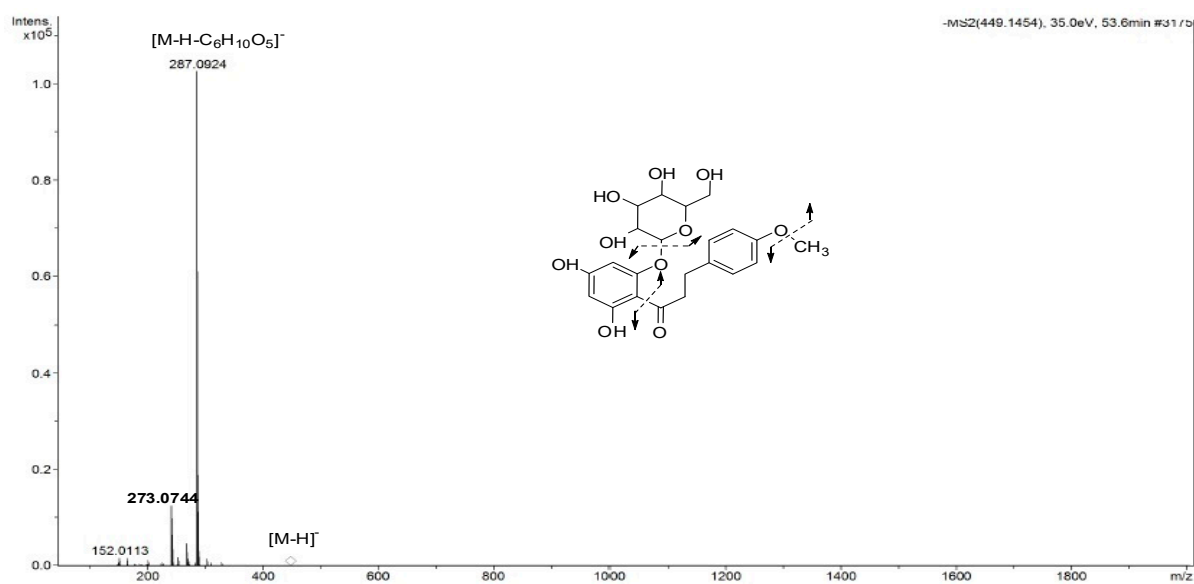

**Figure S4.** MS<sup>2</sup> spectrum and proposed fragmentation pattern of compound **27**.
